# Supplementary material for: The importance of an estuarine salinity gradient on soil organiccarbon stocks of tidal marshes
Source: Copernicus journal article supplement (doi:10.5194/bg-2016-285), 2016-08-01
Supplement: Supplementary file 1 [file bg-2016-285-supplement.zip]

Archive with 4 entries (3 files):
- Supplementary information/
- Supplementary information/SOC, d13C and CN data.xlsx
- Supplementary information/Supplementary information.pdf
- Supplementary information/Texture data.xlsx
