# Supplementary material for: The importance of an estuarine salinity gradient on soil organiccarbon stocks of tidal marshes
Source: Copernicus journal article supplement (doi:10.5194/bg-2016-285), 2016-08-01
Supplement: Supplementary file 1 [file bg-2016-285-supplement.zip › Supplementary information/Supplementary information.pdf]

**Table S1: GPS coordinates of the sample locations**

|                      | Low marsh                          | High marsh                          |
|----------------------|------------------------------------|-------------------------------------|
| Freshwater marsh     | 51° 7' 3.12" N<br>4° 16' 5.42" E   | 51° 7' 5.78" N<br>4° 16' 17.75" E   |
| Brackish water marsh | 51° 24' 10.71" N<br>4° 6' 22.18" E | 51° 24' 17.47" N<br>4° 6' 22.46" E  |
| Saltwater marsh      | 51° 21' 0.08" N<br>3° 43' 14.81" E | 51° 20' 59.15" N<br>3° 43' 10.60" E |

**Table S2: Aboveground, belowground and total biomass and biomass production, maximum rooting depth (m), organic carbon concentration (%) and  $\delta^{13}\text{C}$  signal (‰) for vegetation at the study sites. <sup>A</sup>For below-ground biomass the maximum root depth is given between brackets, <sup>B</sup>see Table 1 in main text, <sup>C</sup>Turnover rates are presented in table S3.**

|                     | Vegetation type                           |              | Biomass (g dry weight m <sup>-2</sup> ) <sup>A</sup> | Annual biomass production (g DW m <sup>-2</sup> yr <sup>-1</sup> ) <sup>C</sup> | Organic carbon % | Nitrogen %  | C:N         | $\delta^{13}\text{C}$ (‰) |
|---------------------|-------------------------------------------|--------------|------------------------------------------------------|---------------------------------------------------------------------------------|------------------|-------------|-------------|---------------------------|
| Freshwater low      | <i>P. australis</i>                       | Above-ground | 2775 ± 858                                           | 2775 ± 858                                                                      | 45.7 ± 0.5       | 1.12 ± 0.03 | 47.5 ± 2.0  | -26.3 ± 0.2               |
|                     |                                           | Litter       | -                                                    | -                                                                               | 45.2 ± 0.8       | 1.00 ± 0.10 | 53.3 ± 7.6  | -26.6 ± 0.2               |
|                     |                                           | Below-ground | 6400 ± 1943 (0.8m)                                   | 4352 ± 1321                                                                     | 42.1 ± 1.0       | 0.83 ± 0.11 | 61.3 ± 9.6  | -26.2 ± 0.2               |
|                     |                                           | Total        | 9175 ± 2124                                          |                                                                                 |                  |             |             |                           |
| Freshwater high     | <i>Salix</i> (leaves)<br><i>U. dioica</i> | Above-ground | 215 ± 72                                             | 215 ± 72                                                                        | 42.9 ± 1.6       | 1.60 ± 0.02 | 31.9 ± 1.2  | -30.5 ± 0.5               |
|                     |                                           | Above-ground | 202 ± 146                                            | 202 ± 146                                                                       | 43.1 ± 0.6       | 1.25 ± 0.03 | 40.7 ± 1.8  | -29.6 ± 0.3               |
|                     |                                           | Below-ground | 160 ± 92 (0.35m)                                     | 34 ± 19                                                                         | 42.1 ± 0.7       | 1.33 ± 0.01 | 36.8 ± 0.2  | -29.8 ± 0.1               |
|                     |                                           | Total        | 577 ± 187                                            |                                                                                 |                  |             |             |                           |
| Brackish water low  | <i>E. athericus</i>                       | Above-ground | 2331 ± 560                                           | 3754 ± 902                                                                      | 45.0 ± 0.4       | 0.96 ± 0.03 | 54.6 ± 2.6  | -26.9 ± 0.3               |
|                     |                                           | Below-ground | 25 ± 8 (0.40m)                                       | 88 ± 28                                                                         | 34.4 ± 4.0       | 0.55 ± 0.03 | 73.1 ± 7.8  | -28.3 ± 0.4               |
|                     |                                           | Total        | 2356 ± 560                                           |                                                                                 |                  |             |             |                           |
| Brackish water high | <i>E. athericus</i>                       | Above-ground | 1746 ± 295                                           | 2811 ± 475                                                                      | 44.4 ± 0.7       | 0.96 ± 0.06 | 54.4 ± 2.1  | -27.0 ± 0.3               |
|                     |                                           | Below-ground | 43 ± 14 (0.20m)                                      | 151 ± 49                                                                        | 35.2 ± 3.5       | 0.58 ± 0.04 | 68.5 ± 10.8 | -27.9 ± 0.4               |
|                     |                                           | Total        | 1789 ± 295                                           |                                                                                 |                  |             |             |                           |
| Saltwater low       | <i>S. anglica</i>                         | Above-ground | 680 ± 163                                            | 1333 ± 319                                                                      | 39.5 ± 0.8       | 1.56 ± 0.10 | 29.6 ± 2.7  | -14.0 ± 0.02              |
|                     |                                           | Below-ground | 1728 ± 399 (0.45m)                                   | 2177 ± 503                                                                      | 40.4 ± 1.7       | 1.19 ± 0.12 | 40.0 ± 4.8  | -13.5 ± 0.3               |
|                     |                                           | Total        | 2408 ± 431                                           |                                                                                 |                  |             |             |                           |
| Saltwater high      | Mixed vegetation <sup>B</sup>             | Above-ground | 1214 ± 331                                           | 1748 ± 477                                                                      | 40.3 ± 0.3       | 1.75 ± 0.04 | 26.9 ± 0.9  | -24.7 ± 0.3               |
|                     |                                           | Below-ground | 11 ± 5 (0.45m)                                       | 22 ± 10                                                                         | 36.8 ± 1.9       | 1.67 ± 0.07 | 25.7 ± 0.9  | -27.4 ± 0.2               |
|                     |                                           | Total        | 1225 ± 331                                           |                                                                                 |                  |             |             |                           |

**Table S3: Turnover rates for above- and belowground biomass at the study sites. Vegetation type is given in table S2.**

**Aboveground biomass**

| Site                        | Turnover time (yr <sup>-1</sup> ) | Reference                     | Remark                                                                                                     |
|-----------------------------|-----------------------------------|-------------------------------|------------------------------------------------------------------------------------------------------------|
| Freshwater low              | 1                                 | Soetaert <i>et al.</i> (2004) | -                                                                                                          |
| Freshwater high             | 1                                 | -                             | As only fallen vegetation is sampled the turnover rate is assumed to be 1 /yr                              |
| Brackish water low and high | 1.61                              | Groenendijk (1984)            | Marsh near Krabbendijke (Oosterschelde), calculated based on the paired-plot data                          |
|                             |                                   | Wolff <i>et al.</i> (1979)    | Marsh near Stroodorpepolder (Oosterschelde), based on max biomass and biomass production                   |
| Saltwater low               | 1.96                              | Gray & Benham (1990)          | Tidal marsh in the UK, based on primary production                                                         |
|                             |                                   | Groenendijk (1984)            | Marsh near Krabbendijke (Oosterschelde), calculated based on his paired-plot data                          |
| Saltwater high              | 1.44                              | Groenendijk (1984)            | Triglochin maritima, marsh near Krabbendijke (Oosterschelde), calculated based on his single-plot data     |
|                             |                                   | Wolff <i>et al.</i> (1979)    | Elymus athericus, marsh near Stroodorpepolder (Oosterschelde), based on max biomass and biomass production |

**Belowground biomass**

| Site                        | Turnover time (yr <sup>-1</sup> ) | Reference                          | Remark                                                                                                    |
|-----------------------------|-----------------------------------|------------------------------------|-----------------------------------------------------------------------------------------------------------|
| Freshwater low              | 0.68                              | Soetaert <i>et al.</i> , 2004)     | Average value for roots and rhizomes                                                                      |
| Freshwater high             | 0.21                              | Gill & Jackson (2000)              | Salix bebbiana (Canada);<br>Salix spp. (Alaska)                                                           |
| Brackish water low and high | 3.5                               | Bouma <i>et al.</i> (2002)         | Based on root ingrowth cores, marsh near Waarde (Westerschelde)                                           |
| Saltwater low               | 1.26                              | Bouma <i>et al.</i> (2002)         | Based on root ingrowth cores, marsh near Waarde (Westerschelde)                                           |
|                             |                                   | Gray & Benham (1990)               | Tidal marsh in the UK, based on primary production                                                        |
| Saltwater high              | 1.99                              | Bouma <i>et al.</i> (2002)         | E. athericus, based on root ingrowth cores, marsh near Waarde (Westerschelde)                             |
|                             |                                   | Groenendijk & Vink-Lievaart (1987) | Triglochin maritima, average for 0-60 cm depth, Oosterschelde, based on biomass production / max. biomass |

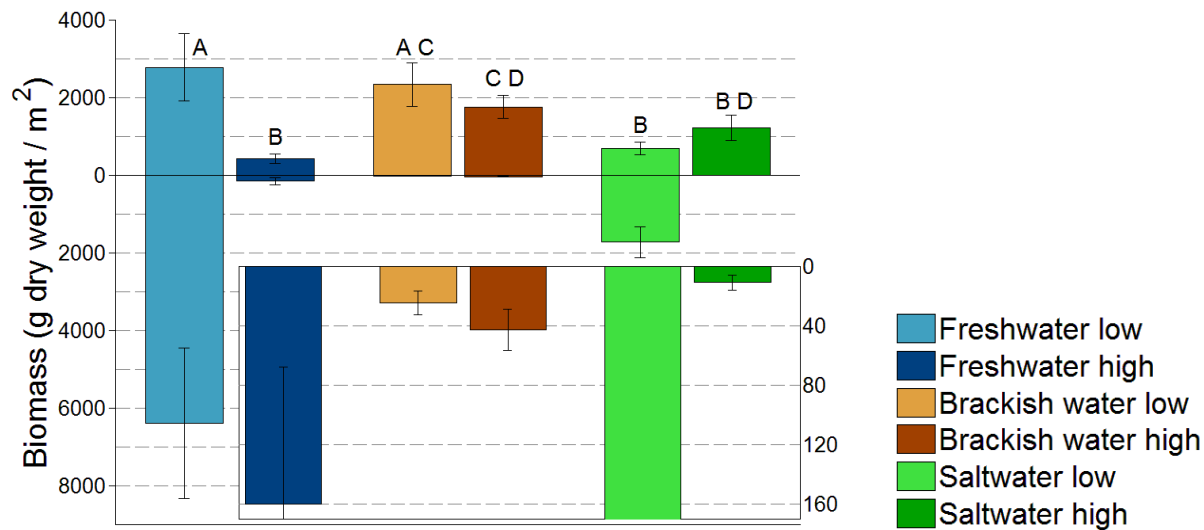

Figure S1: Total above- and belowground biomass for the study sites (g dry weight  $m^{-2}$ ) (the inset is a magnification of the root biomass). Significantly different aboveground biomass values between sites are denoted by different letters. Upward pointing bars represent aboveground biomass, downward pointing bars represent belowground biomass. Standard deviations for aboveground biomass are calculated based on 5 replicas, for root biomass on 3 replicas.

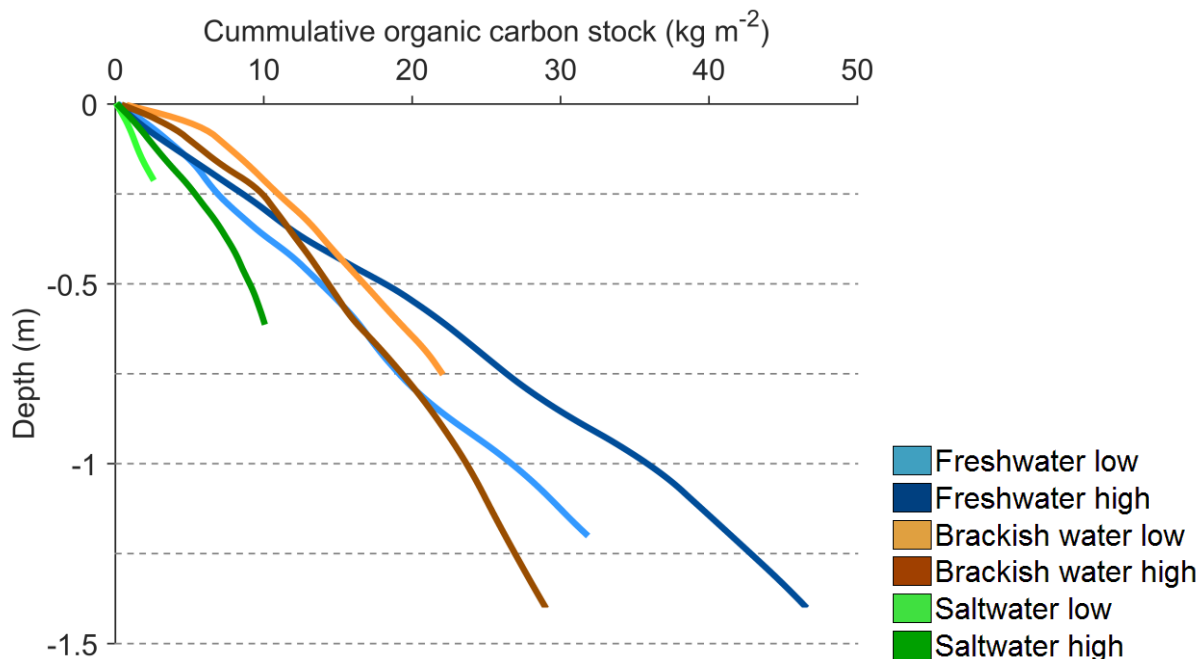

Figure S2: Depth profiles of the cumulative organic carbon stock for depth intervals of 0.01m. No standard deviations are shown to improve readability.

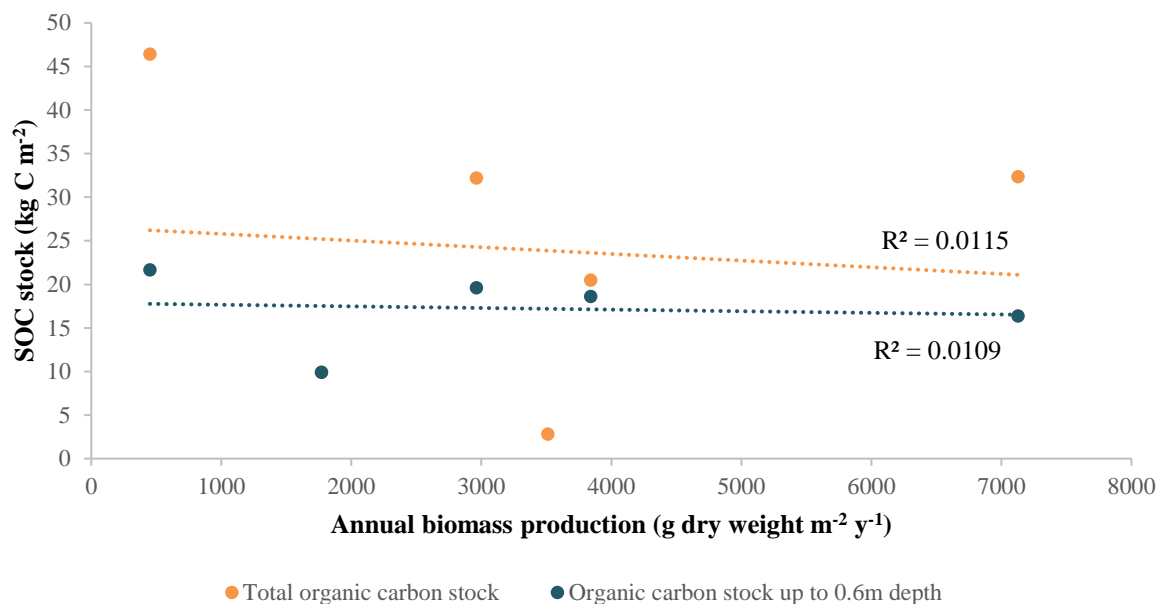

**Figure S3: Relationship between the total annual biomass production (above- and belowground) and soil organic carbon stock, for both total stocks and stocks down to 0.6m depth.**

## References

- 5 Bouma, T. J., Hengst, K., Koutstaal, B. P. and Soelen, J. Van: Estimating root lifespan of two grasses at contrasting elevation in a salt marsh by applying vitality staining on roots from in-growth cores, *Plant Ecol.*, 165, 235–245, 2002.
- Gill, R. A. and Jackson, R. B.: Global patterns of root turnover for terrestrial ecosystems, *New Phytol.*, 147, 13–31, 2000.
- Gray, A. J. and Benham, P. E. M., Eds.: *Spartina anglica - a research review*, HMSO, London., 1990.
- Groenendijk, A. M.: Primary production of 4 dominant salt-marsh angiosperms in the southwestern Netherlands, *Vegetatio*, 57(2/3), 143–152, 1984.
- 10 Groenendijk, A. M. and Vink-Lievaart, M. A.: Primary production and biomass on a Dutch salt marsh: emphasis on the below-ground component, *Vegetatio*, 70, 21 – 17, 1987.
- Soetaert, K., Hoffmann, M., Meire, P., Starink, M., Van Oevelen, D., Van Regenmortel, S. and Cox, T.: Modeling growth and carbon allocation in two reed beds (*Phragmites australis*) in the Scheldt estuary, *Aquat. Bot.*, 79, 211–234, doi:10.1016/j.aquabot.2004.02.001, 2004.
- 15 Wolff, W. J., Van Eeden, M. J. and Lammens, E.: Primary production and import of particulate organic matter on a salt marsh in The Netherlands, *Netherlands J. Sea Res.*, 13(2), 242–255, 1979.
