# Supplementary material for: The importance of an estuarine salinity gradient on soil organiccarbon stocks of tidal marshes
Source: Copernicus journal article supplement (doi:10.5194/bg-2016-285), 2016-08-01
Supplement: Supplementary file 1 [file bg-2016-285-supplement.zip › Supplementary information/Texture data.xlsx]

## Sheet: Blad1
This sheet contains the soil texture data from Van de Broek et al. (2016), Biogeosciences (submitted)
Samples were collected at 0.03m depth intervals. Each value in this tabel contains the data for a 0.03m interval
e.g. Average depth -0.015 contains the OC% for the interval 0 - 0.03m depth
The average values and standard deviations are based on the analysis of 3 replicate soil cores
Contact: Marijn.vandebroek@kuleuven.be
Freshwater marsh low
Average					Standard deviation
Depth (m)	%clay (<2 µm)	%silt (2µm - 63 µm)	%sand (>63 µm)		Depth (m)	%clay (<2 µm)	%silt (2µm - 63 µm)	%sand (>63 µm)
-0.015	14.0214	63.61	22.3637		-0.015	2.90675	3.4795	5.76115
-0.195	10.79	63.5933	25.5953		-0.195	3.02943	4.63241	5.90946
-0.375	14.4929	62.98	22.5169		-0.375	2.75265	3.22042	1.48665
-0.555	18.1056	70.4647	11.4352		-0.555	5.3684	6.46608	11.2207
-0.735	12.867	69.31	17.7991		-0.735	6.51096	6.3195	11.213
-0.915	18.4887	75.8767	5.61802		-0.915	0.831856	2.00023	2.12547
-1.095	16.0715	72.7233	11.2151		-1.095	3.25523	3.92393	5.53867
-1.275	14.0151	78.2367	7.76327		-1.275	1.03444	1.34968	2.02684
-1.455	11.2923	64.68	24.03		-1.455	5.81181	6.56341	11.5143
Freshwater marsh high
Average					Standard deviation
Depth (m)	%clay (<2 µm)	%silt (2µm - 63 µm)	%sand (>63 µm)		Depth (m)	%clay (<2 µm)	%silt (2µm - 63 µm)	%sand (>63 µm)
-0.015	12.1825	74.5767	13.2205		-0.015	3.41995	2.80404	4.62532
-0.195	9.84511	63.1333	27.0349		-0.195	3.39957	3.43005	6.6188
-0.375	11.8367	69.6867	18.4736		-0.375	3.11246	2.70424	0.41697
-0.555	21.0226	71.5	7.49243		-0.555	2.90646	1.1421	1.98742
-0.735	13.7191	70.9467	15.3692		-0.735	8.36491	8.94028	15.1025
-0.915	12.3264	71.76	15.9234		-0.915	4.54806	2.65565	6.66728
-1.095	10.8435	62.0033	27.1553		-1.095	4.86613	4.12553	8.9149
-1.275	11.5757	64.1533	24.2589		-1.275	3.5779	1.32696	3.65143
-1.455	11.5776	67.0933	21.3352		-1.455	4.60255	2.11304	4.85583
-1.635	13.4244	71.63	14.9614		-1.635	1.15425	0.19799	0.95557
Brackish marsh low
Average					Standard deviation
Depth (m)	%clay (<2 µm)	%silt (2µm - 63 µm)	%sand (>63 µm)		Depth (m)	%clay (<2 µm)	%silt (2µm - 63 µm)	%sand (>63 µm)
-0.015	12.9115	60.2	26.9089		-0.015	3.68843	4.02587	7.65567
-0.195	11.4913	61.24	27.2887		-0.195	2.96408	3.47707	0.841707
-0.375	14.0595	70.19	15.7539		-0.375	1.80244	3.28658	1.74414
-0.555	16.7686	72.3267	10.9066		-0.555	8.00499	3.21299	4.88178
-0.735	9.01015	74.2033	16.7819		-0.735	1.05907	2.84995	3.02799
Brackish marsh high
Average					Standard deviation
Depth (m)	%clay (<2 µm)	%silt (2µm - 63 µm)	%sand (>63 µm)		Depth (m)	%clay (<2 µm)	%silt (2µm - 63 µm)	%sand (>63 µm)
-0.015	15.6717	52.7567	31.584		-0.015	0.471939	4.18309	4.60753
-0.195	19.1619	73.1	7.72738		-0.195	6.51473	3.44835	3.30089
-0.375	11.7663	70.1667	18.056		-0.375	1.40585	3.23584	1.93671
-0.555	10.2014	67.5033	22.2628		-0.555	1.25082	0.712905	0.515555
-0.735	13.1316	69.9933	16.8596		-0.735	1.02976	1.76376	1.06779
-0.915	18.7165	69.0133	12.2452		-0.915	2.58881	3.64766	1.31464
-1.095	13.1694	65.6867	21.1547		-1.095	0.570026	2.31321	2.77545
-1.275	13.0496	72.0233	14.9246		-1.275	0.955733	1.22973	2.11463
-1.455	15.0735	66.84	18.0829		-1.455	1.64127	3.02392	3.53707
Saltmarsh low
Average					Standard deviation
Depth (m)	%clay (<2 µm)	%silt (2µm - 63 µm)	%sand (>63 µm)		Depth (m)	%clay (<2 µm)	%silt (2µm - 63 µm)	%sand (>63 µm)
-0.015	9.06871	64.6433	26.2794		-0.015	2.11234	4.37265	2.23998
-0.195	12.6965	57.8033	29.4978		-0.195	1.25287	2.35343	3.5758
-0.375	4.81388	20.47	74.7302		-0.375	0.867487	5.35286	5.73061
-0.555	4.0353	18.86	77.1023		-0.555	0.506709	3.66281	4.16733
Saltwater high
Average					Standard deviation
Depth (m)	%clay (<2 µm)	%silt (2µm - 63 µm)	%sand (>63 µm)		Depth (m)	%clay (<2 µm)	%silt (2µm - 63 µm)	%sand (>63 µm)
-0.015	10.0186	65.6967	24.2771		-0.015	5.19246	7.5346	10.3563
-0.195	14.1183	65.4967	20.3953		-0.195	5.34302	1.90463	6.48349
-0.375	17.3951	72.79	9.81563		-0.375	7.24791	2.73786	5.57119
-0.555	8.35522	57.6067	34.0496		-0.555	3.17167	9.43865	8.79905
-0.735	15.291	63.31	21.3773		-0.735	2.85634	5.88313	8.74571
-0.915	8.74179	45.88	45.3837		-0.915	1.00116	14.0714	15.0518
-1.095	9.74374	53.36	36.8686		-1.095	5.2669	2.87085	8.14012
-1.275	8.3622	46.09	45.5518		-1.275	3.96151	18.8576	22.4161
-1.455	6.59285	32.745	60.6662		-1.455	0.444523	15.3089	14.9059
